# Supplementary material for: Molecular dissection of effector mechanisms of RAS-mediated resistance to anti-EGFR antibody therapy
Source: PubMed Central journal article supplement (PMC5542236; doi:10.18632/oncotarget.17438), 2017-04-26
Supplement: oncotarget-08-45898-s001.pdf [file oncotarget-08-45898-s001.pdf]

## Molecular dissection of effector mechanisms of *RAS*-mediated resistance to anti-EGFR antibody therapy

### SUPPLEMENTARY MATERIALS

**A****Difi- $\Delta$ RAF-1/ER<sup>Tam</sup>**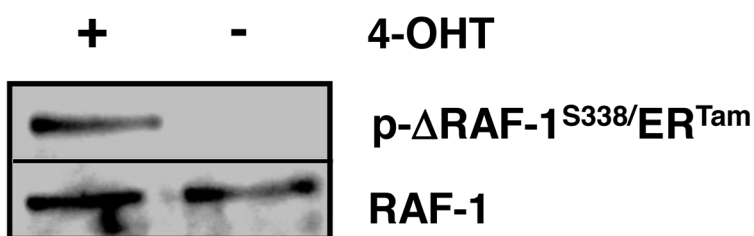**B****Difi-myr-AKT/ER<sup>Tam</sup>**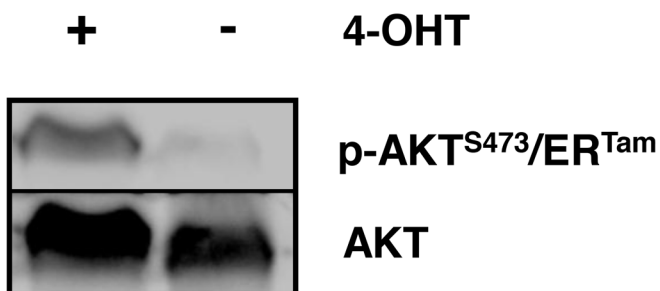

**Supplementary Figure 1:** (A) Difi *RAS* wild type cells were retrovirally transduced to stably express a  $\Delta$ RAF-1/ER<sup>Tam</sup> construct. Phosphorylation of  $\Delta$ RAF-1/ER<sup>Tam</sup> was strongly induced by the addition of 4-hydroxytamoxifen (4-OHT). (B) Difi *RAS* wild type cells were retrovirally transduced to stably express a myristoylated-AKT/ER<sup>Tam</sup> (myr-AKT/ER<sup>Tam</sup>) construct. Phosphorylation of myr-AKT/ER<sup>Tam</sup> was strongly induced by the addition of 4-hydroxytamoxifen (4-OHT).

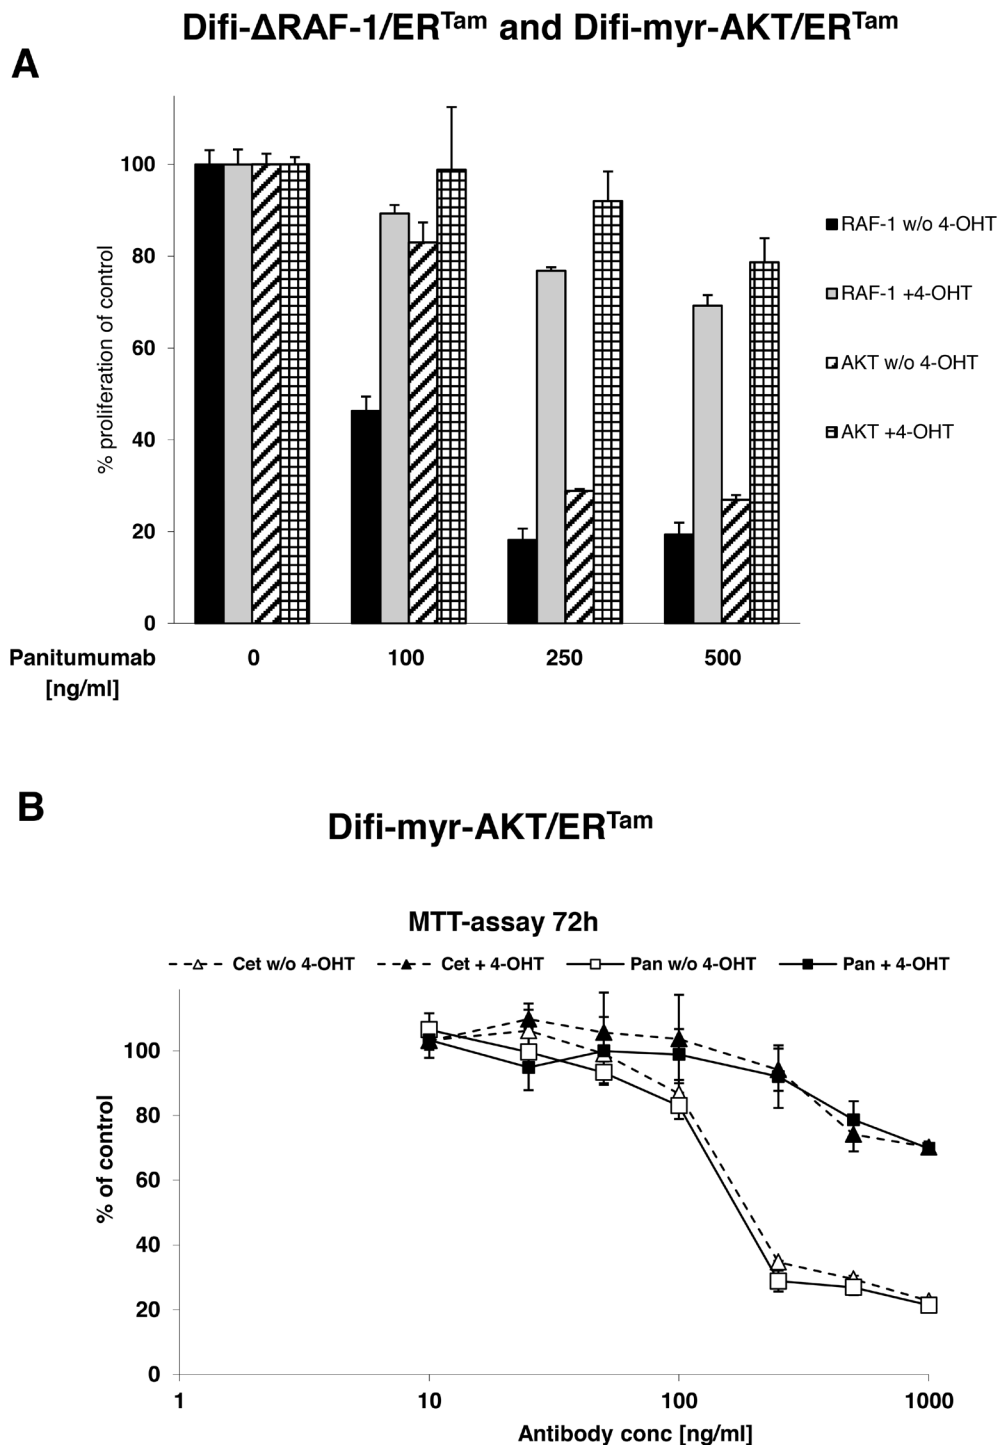

**Supplementary Figure 2:** (A) Clonogenic survival of Difi- $\Delta$ RAF-1/ER<sup>Tam</sup>- and Difi-myr-AKT/ER<sup>Tam</sup> cells cultured in the presence of panitumumab with or without 4-OHT as indicated. Mean colony numbers (+ SD) normalized to medium control from three independent experiments are given. (B) Proliferation of Difi-myr-AKT/ER<sup>Tam</sup> cells grown in the presence of increasing concentrations of cetuximab or panitumumab with or without 4-OHT as indicated. Mean values ( $\pm$  SD) of three independent MTT assays.

**A431-ΔRAF-1/ER<sup>Tam</sup>**

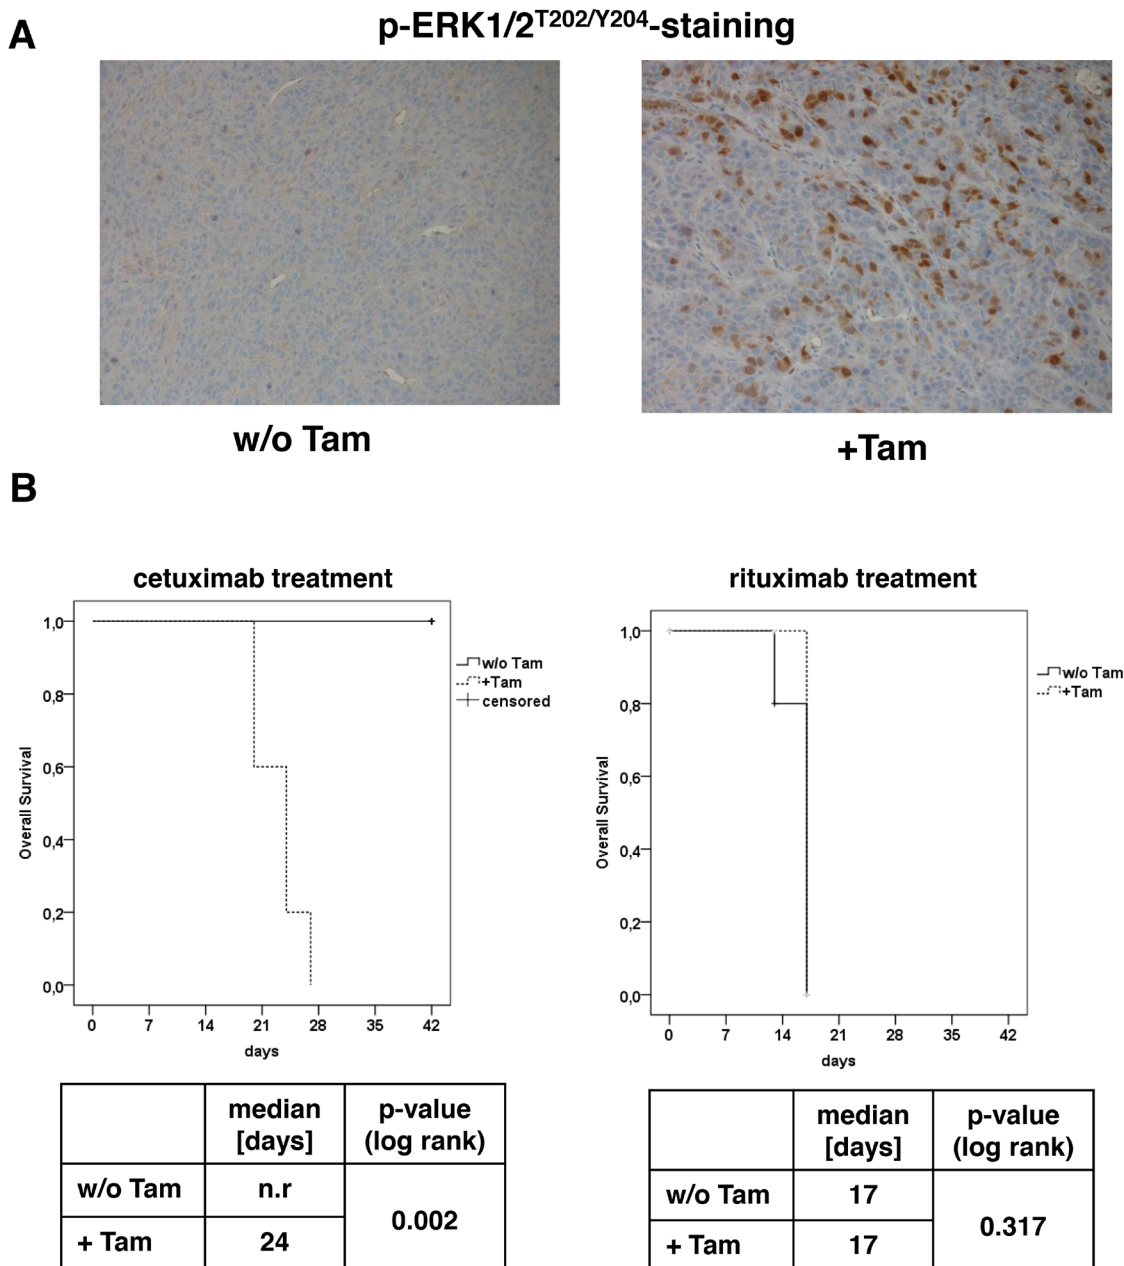

**Supplementary Figure 3:** (A) Representative immunohistochemical staining of p-ERK1/2<sup>T202/Y204</sup> in explanted A431-ΔRAF-1/ER<sup>Tam</sup> tumors of NOD/SCID mice fed with or without tamoxifen diet. (B) Kaplan-Meier plots of overall survival of NOD/SCID mice following subcutaneous injection of 2x10<sup>6</sup>A431-ΔRAF-1/ER<sup>Tam</sup> cells. Mice were fed with (dashed line) or without (solid line) tamoxifen diet and were treated with 1 mg cetuximab (left) or 1 mg rituximab (right) twice weekly. Tamoxifen fed mice exhibited a significantly reduced overall survival upon cetuximab treatment as compared with mice fed without tamoxifen (p = 0.002, log rank test) (left). Upon rituximab treatment mice fed with or without tamoxifen diet died rapidly due to progressive tumor growth (right).

**p-AKT<sup>S473</sup>**

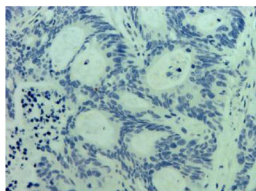

**IHC 0+**

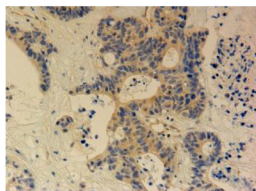

**IHC 1+**

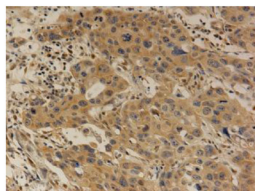

**IHC 2+**

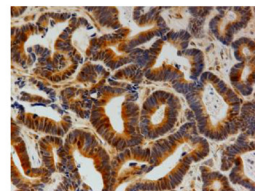

**IHC 3+**

**p-ERK1/2<sup>T202/Y204</sup>**

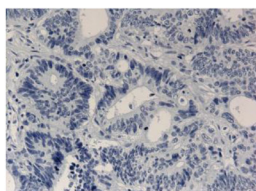

**0%**

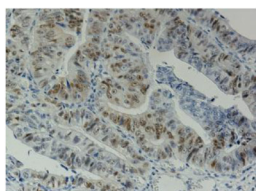

**16%**

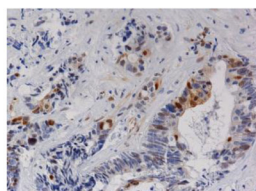

**63%**

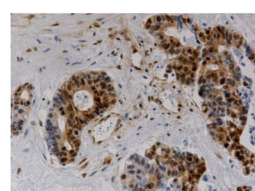

**84%**

**p-p70S61<sup>T389</sup>**

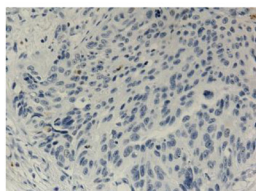

**0%**

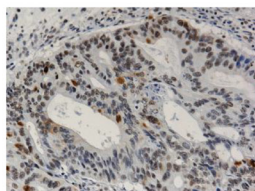

**15%**

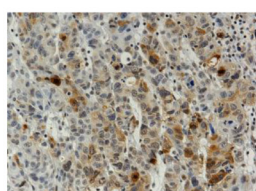

**64%**

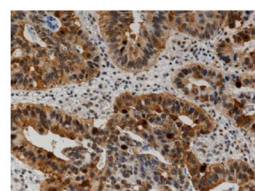

**89%**

**Supplementary Figure 4: Representative immunohistochemical stainings of p-AKT<sup>S473</sup>, p-ERK1/2<sup>T202/Y204</sup> and p-p70S61<sup>T389</sup> in FFPE tumor samples of patients with metastatic colorectal cancer treated with cetuximab and irinotecan.**

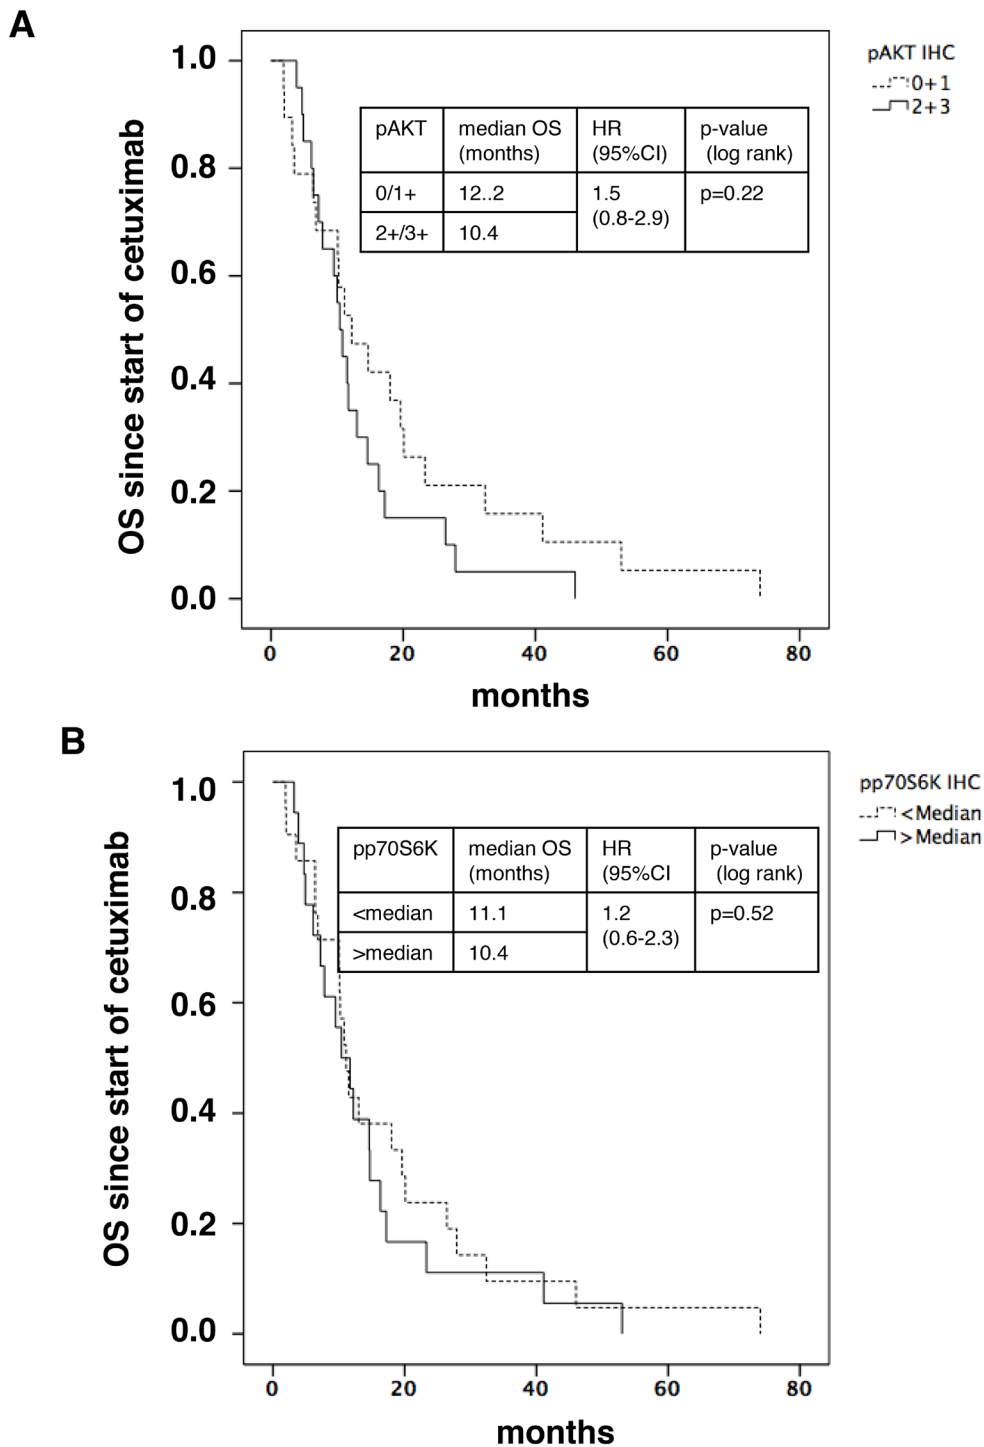

**Supplementary Figure 5:** (A) Kaplan-Meier plot of overall survival (OS) from start of treatment with cetuximab in combination with irinotecan of patients with mCRC with immunohistochemically low stained (IHC0+ and 1+) (dashed line) and strong stained (IHC2+ and 3+) (solid line) pAKT<sup>S473</sup>. Patients with tumors stained low for p-AKT<sup>S473</sup> demonstrated a numerical prolonged OS (12.2 vs. 10.4 months; p = 0.22 log rank). (B) Kaplan-Meier plot of overall survival (OS) of patients with immunohistochemically stained p-p70S6K1<sup>T359</sup> below the median (dashed line) or above the median (solid line). Patients with tumors stained for p-p70S6K1<sup>T359</sup> below the median demonstrated a numerical prolonged OS (11.1 vs. 10.4 months; p = 0.52 log rank). The difference did not reach statistical significance.

Difi *HRAS*<sup>G12V</sup>

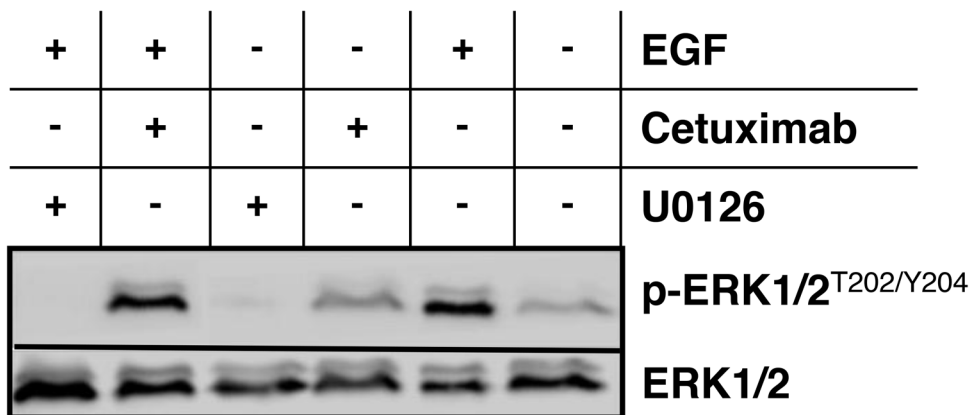

**Supplementary Figure 6: Immunoblot analysis of Difi-*HRAS*<sup>G12V</sup> cells treated with EGF (10 ng/ml), cetuximab (1 µg/ml), the MEK inhibitor U0126 (1 µM) and in combination.** Inhibition of constitutive and ligand induced phosphorylation of MAPK-signal transducer ERK1/2 by the pharmacological inhibitor U0126. Note that cetuximab alone did not inhibit the phosphorylation of ERK1/2 in Difi-*HRAS*<sup>G12V</sup> cells.

**Supplementary Table 1: Patients characteristics (N = 39)**

| Characteristics                                                  | N (%)                  |
|------------------------------------------------------------------|------------------------|
| Female                                                           | 11 (28%)               |
| Median age (range)                                               | 60 years (41-80)       |
| Median time from diagnosis to start cetuximab/irinotecan (range) | 20.5 months (6.5-77.4) |
| Tumor localization                                               |                        |
| Rectum                                                           | 10 (26%)               |
| Colon                                                            | 29 (74%)               |
| Synchronous metastases                                           | 28 (72%)               |
| Resection of primary tumor                                       | 35 (90%)               |
| Adjuvant/neoadjuvant (radio-) chemotherapy                       | 6 (15%)                |
| Liver limited disease                                            | 20 (51%)               |
| Median lines of chemotherapy                                     | 3 (1-5)                |
| Irinotecan received                                              | 39 (100%)              |
| Oxaliplatin received                                             | 37 (95%)               |
| Fluoropyrimidin received                                         | 39 (100%)              |
| Bevacizumab received                                             | 8 (20%)                |
| VEGFR-TKI received (vatalanib, sorafenib)                        | 13 (33%)               |
| Mitomycin received                                               | 2 (5%)                 |
| <i>KRAS</i> exon 2 mutations (3 patients not tested)             | 14 (39%)               |
| Codon 12                                                         | 11 (31%)               |
| Codon 13                                                         | 3 (8%)                 |
| <i>BRAF</i> exon 15 mutations (5 patients not tested)            | 3 (9%)                 |
| Codon 600                                                        | 3 (9%)                 |
| <i>All RAS/BRAF tested population (N = 23)</i>                   |                        |
| <i>KRAS</i> exon 2 mutations                                     | 15 (65%)               |
| Codon 12                                                         | 12 (52%)               |
| Codon 13                                                         | 3 (13%)                |
| <i>BRAF</i> exon 15 mutations                                    | 3 (13%)                |
| Codon 600                                                        | 3 (13%)                |

**Supplementary Table 2: Expression of pAKT<sup>S473</sup>, pERK1/2<sup>T202/Y204</sup>, and pp70S6K1<sup>T389</sup> (N = 39)**

| Marker                                      | N (%)         |
|---------------------------------------------|---------------|
| pAKT <sup>S473</sup>                        |               |
| 0+                                          | 6 (15%)       |
| 1+                                          | 13 (33%)      |
| 2+                                          | 14 (36%)      |
| 3+                                          | 6 (15%)       |
| pERK1/2 <sup>T202/Y204</sup> median (range) | 21% (0-84%)   |
| pp70S6K1 <sup>T389</sup> median (range)     | 17.4% (9-90%) |



Supplementary Table 3A: All *RAS/BRAF* population (N = 23)

| All pts                               | pAKT <sup>S473</sup> low                                              | pAKT <sup>S473</sup> high | pERK1/2 <sup>T202/Y204</sup> ≤ median                                 | pERK1/2 <sup>T202/Y204</sup> > median |
|---------------------------------------|-----------------------------------------------------------------------|---------------------------|-----------------------------------------------------------------------|---------------------------------------|
| pp70S6K1 <sup>T389</sup> < median     | 9                                                                     | 6                         | 12                                                                    | 3                                     |
| pp70S6K1 <sup>T389</sup> > median     | 1                                                                     | 7                         | 1                                                                     | 7                                     |
|                                       | p = 0.038, chi-square;<br>odds ratio (95% CI): 10.500 (1.015-108.577) |                           | p = 0.003, chi-square;<br>odds ratio (95% CI): 28.000 (2.422-323.703) |                                       |
| pERK1/2 <sup>T202/Y204</sup> ≤ median | 9                                                                     | 4                         |                                                                       |                                       |
| pERK1/2 <sup>T202/Y204</sup> > median | 1                                                                     | 9                         |                                                                       |                                       |
|                                       | p = 0.006, chi-square;<br>odds ratio (95% CI): 20.250 (1.878-218.390) |                           |                                                                       |                                       |

Supplementary Table 3B: All *RAS/BRAF* population (N = 23)

|                                       | <i>all RAS/BRAF wt</i>                                                           |                                   | <i>RAS mut or BRAFmut</i>                                                          |                                   | <i>all RAS/BRAF wt</i>                                                             |                           | <i>RAS mut or BRAFmut</i>                                                   |                           |
|---------------------------------------|----------------------------------------------------------------------------------|-----------------------------------|------------------------------------------------------------------------------------|-----------------------------------|------------------------------------------------------------------------------------|---------------------------|-----------------------------------------------------------------------------|---------------------------|
|                                       | pp70S6K1 <sup>T389</sup> ≤ median                                                | pp70S6K1 <sup>T389</sup> > median | pp70S6K1 <sup>T389</sup> ≤ median                                                  | pp70S6K1 <sup>T389</sup> > median | pAKT <sup>S473</sup> low                                                           | pAKT <sup>S473</sup> high | pAKT <sup>S473</sup> low                                                    | pAKT <sup>S473</sup> high |
| pERK1/2 <sup>T202/Y204</sup> ≤ median | 3                                                                                | 1                                 | 9                                                                                  | 0                                 | 3                                                                                  | 1                         | 3                                                                           | 3                         |
| pERK1/2 <sup>T202/Y204</sup> > median | 0                                                                                | 2                                 | 3                                                                                  | 5                                 | 0                                                                                  | 2                         | 1                                                                           | 7                         |
|                                       | p = 0.2, chi-square;<br>odds ratio (95% CI): 0.250<br>(0.046-1.365) <sup>1</sup> |                                   | p = 0.009, chi-square;<br>odds ratio (95% CI):<br>2.667 (1.090-6,524) <sup>2</sup> |                                   | p = 0.200, chi-square;<br>odds ratio (95% CI): 0.250<br>(0.046-1.365) <sup>3</sup> |                           | p = 0.036, chi-square;<br>odds ratio (95% CI):<br>14.000<br>(1.135-172.642) |                           |

<sup>1</sup>For pp70S6K1<sup>T389</sup> > median cohort; <sup>2</sup>for pp70S6K1<sup>T389</sup> ≤ median cohort; <sup>3</sup>for pAKT<sup>S473</sup> high cohort.

Supplementary Table 3C: Efficacy data (all *RAS/BRAF* population; N = 23)

|                                    | N                      | %  |
|------------------------------------|------------------------|----|
| ORR                                | 4                      | 17 |
| CR                                 | 0                      | 0  |
| PR                                 | 4                      | 17 |
| SD                                 | 13                     | 57 |
| PD                                 | 6                      | 26 |
| Median PFS                         | 3.5 months (2.2-4.8)   |    |
| Median OS since start of cetuximab | 10.4 months (9.3-11.5) |    |

(Continued)

Supplementary Table 3D: ORR (all RAS/BRAF population; N = 23)

| Marker                                                                                                  | ORR (%)  | Odds ratio (95% CI) | p-value |
|---------------------------------------------------------------------------------------------------------|----------|---------------------|---------|
| All patients                                                                                            | 17       |                     |         |
| <i>RAS</i> wt vs <i>mut</i> *                                                                           | 25 vs 13 | 2.2 (0.2-19.3)      | 0.48    |
| <i>BRAF</i> wt vs <i>mut</i> #                                                                          | 21 vs 0  | 1.2 (1.0-1.5)       | 0.38    |
| All <i>RAS/BRAF</i> wt vs <i>RAS</i> or <i>BRAF</i> <i>mut</i>                                          | 33 vs 12 | 3.8 (0.4-35.6)      | 0.23    |
| pERK1/2 <sup>T202/Y204</sup> <median vs >median                                                         | 23 vs 10 | 2.7 (0.2-30.8)      | 0.41    |
| pAKT <sup>S473</sup> 0+/1+ vs 2+/3+                                                                     | 30 vs 8  | 5.1 (0.4-59.5)      | 0.16    |
| pp70S6K1 <sup>T389</sup> <median vs >median                                                             | 20 vs 12 | 1.8 (0.2-20.2)      | 0.65    |
| <i>RAS/BRAF</i> wt and pERK1/2 <sup>T202/Y204</sup> <median vs >median                                  | 25 vs 50 | 0.3 (0.0-11.9)      | 0.60    |
| <i>RAS</i> <i>mut</i> * or <i>BRAF</i> <i>mut</i> # and pERK1/2 <sup>T202/Y204</sup> <median vs >median | 22 vs 0  | 2.1 (1.2-3.7)       | 0.16    |
| <i>RAS/BRAF</i> wt and pAKT <sup>S473</sup> 0+/1+ vs 2+/3+                                              | 33 vs 33 | 1.0 (0.0-29.8)      | 1.00    |
| <i>RAS</i> <i>mut</i> * or <i>BRAF</i> <i>mut</i> # and pAKT <sup>S473</sup> 0+/1+ vs 2+/3+             | 39 vs 0  | 3.0 (1.5-6.1)       | 0.07    |
| <i>RAS/BRAF</i> wt and pp70S6K1 <sup>T389</sup> <median vs >median                                      | 33 vs 33 | 1.0 (0.0-29.8)      | 1.00    |
| <i>RAS</i> <i>mut</i> * or <i>BRAF</i> <i>mut</i> # and pp70S6K1 <sup>T389</sup> <median vs >median     | 17 vs 0  | 1.5 (1.0-2.1)       | 0.33    |

\*all *RAS*; #exon 15.

Supplementary Table 3E: PFS (all RAS/BRAF population; N = 23)

| Marker                                                                                                    | Median PFS (months) | HR (95% CI)    | p-value (log rank) |
|-----------------------------------------------------------------------------------------------------------|---------------------|----------------|--------------------|
| All patients                                                                                              | 3.5                 |                |                    |
| <i>RAS</i> wt vs <i>mut</i> *                                                                             | 2.5 vs 3.5          | 0.8 (0.3-2.1)  | 0.68               |
| <i>BRAF</i> wt vs <i>mut</i> #                                                                            | 3.5 vs 1.4          | 6.0 (1.1-25.8) | 0.02               |
| All <i>RAS/BRAF</i> wt vs <i>RAS</i> or <i>BRAF</i> <i>mut</i>                                            | 3.5 vs 3.3          | 1.3 (0.5-3.5)  | 0.65               |
| pERK1/2 <sup>T202/Y204</sup> < median vs > median                                                         | 3.5 vs 2.8          | 0.7 (0.3-1.8)  | 0.44               |
| pAKT <sup>S473</sup> 0+/1+ vs 2+/3+                                                                       | 3.5 vs 3.5          | 0.6 (0.2-1.5)  | 0.27               |
| pp70S6K1 <sup>T389</sup> < median vs > median                                                             | 3.3 vs 4.1          | 0.4 (0.2-1.2)  | 0.09               |
| <i>RAS/BRAF</i> wt and pERK1/2 <sup>T202/Y204</sup> < median vs > median                                  | 3.5 vs 2.8          | 0.4 (0.0-3.9)  | 0.45               |
| <i>RAS</i> <i>mut</i> * or <i>BRAF</i> <i>mut</i> # and pERK1/2 <sup>T202/Y204</sup> < median vs > median | 3.5 vs 2.5          | 0.9 (0.3-2.6)  | 0.87               |
| <i>RAS/BRAF</i> wt and pAKT <sup>S473</sup> 0+/1+ vs 2+/3+                                                | 3.5 vs 4.2          | 0.2 (0.0-2.4)  | 0.23               |
| <i>RAS</i> <i>mut</i> * or <i>BRAF</i> <i>mut</i> # and pAKT <sup>S473</sup> 0+/1+ vs 2+/3+               | 2.5 vs 3.3          | 0.8 (0.3-2.2)  | 0.61               |
| <i>RAS/BRAF</i> wt and pp70S6K1 <sup>T389</sup> < median vs > median                                      | 3.5 vs 4.1          | 0.5 (0.1-3.2)  | 0.49               |
| <i>RAS</i> <i>mut</i> * or <i>BRAF</i> <i>mut</i> # and pp70S6K1 <sup>T389</sup> < median vs > median     | 3.3 vs 4.8          | 0.5 (0.1-1.5)  | 0.20               |

\*all *RAS*; #exon 15.

(Continued)

Supplementary Table 3F: OS (all RAS/BRAF population; N = 23)

| Marker                                                                                                | Median OS (months) | HR (95% CI)    | p-value (log rank) |
|-------------------------------------------------------------------------------------------------------|--------------------|----------------|--------------------|
| All patients                                                                                          | 10.4               |                |                    |
| <i>RAS</i> wt vs mut*                                                                                 | 10.8 vs 10.1       | 1.2 (0.5-2.9)  | 0.70               |
| <i>BRAF</i> wt vs mut <sup>#</sup>                                                                    | 10.2 vs 10.8       | 1.5 (0.4-5.3)  | 0.53               |
| All <i>RAS/BRAF</i> wt vs <i>RAS</i> or <i>BRAF</i> mut                                               | 10.4 vs 10.2       | 1.2 (0.5-3.1)  | 0.69               |
| pERK1/2 <sup>T202/Y204</sup> < median vs > median                                                     | 11.5 vs 7.8        | 2.7 (1.1-7.0)  | 0.04               |
| pAKT <sup>S473</sup> 0+/1+ vs 2+/3+                                                                   | 10.2 vs 10.4       | 1.2 (0.5-3.0)  | 0.61               |
| pp70S6K1 <sup>T389</sup> < median vs > median                                                         | 10.8 vs 7.8        | 1.2 (0.5-2.9)  | 0.71               |
| <i>RAS/BRAF</i> wt and pERK1/2 <sup>T202/Y204</sup> < median vs > median                              | 13.0 vs 4.9        | 5.8 (0.5-65.9) | 0.15               |
| <i>RAS</i> mut* or <i>BRAF</i> mut <sup>#</sup> and pERK1/2 <sup>T202/Y204</sup> < median vs > median | 11.1 vs 7.8        | 2.3 (0.8-6.6)  | 0.13               |
| <i>RAS/BRAF</i> wt and pAKT <sup>S473</sup> 0+/1+ vs 2+/3+                                            | 20.1 vs 10.4       | 4.0 (0.4-39.5) | 0.23               |
| <i>RAS</i> mut* or <i>BRAF</i> mut <sup>#</sup> and pAKT <sup>S473</sup> 0+/1+ vs 2+/3+               | 10.2 vs 10.0       | 1.0 (0.4-2.7)  | 0.97               |
| <i>RAS/BRAF</i> wt and pp70S6K1 <sup>T389</sup> < median vs > median                                  | 13.0 vs 10.4       | 0.8 (0.1-5.0)  | 0.83               |
| <i>RAS</i> mut* or <i>BRAF</i> mut <sup>#</sup> and pp70S6K1 <sup>T389</sup> < median vs > median     | 10.2 vs 7.8        | 1.5 (0.5-4.5)  | 0.48               |

\*all RAS; #exon 15.

Supplementary Table 4A: Patients characteristics (N = 88)

| Characteristics                      | N (%)            |
|--------------------------------------|------------------|
| Female                               | 39 (44%)         |
| Median age at profiling (range)      | 58 years (23-83) |
| <b><i>KRAS</i> mutations</b>         | 22 (25%)         |
| Exon 2                               | 19 (22%)         |
| Exon 3                               | 2 (2%)           |
| Exon 4                               | 1 (1%)           |
| <b><i>NRAS</i> mutations</b>         | 7 (8%)           |
| Exon 2                               | 2 (2%)           |
| Exon 3                               | 5 (6%)           |
| Exon 4                               | 0 (0%)           |
| <b><i>All RAS</i> mutations</b>      | 29 (33%)         |
| <b><i>BRAF</i> exon 15 mutation</b>  | 6 (7%)           |
| <b><i>All RAF/BRAF</i> mutations</b> | 35 (40%)         |
| <b><i>PIK3CA</i> mutations</b>       | 7 (8%)           |
| Exon 10                              | 7 (8%)           |
| Exon 21                              | 0 (0%)           |

(Continued)

Supplementary Table 4B: Expression of pAKT<sup>S473</sup>, pERK1/2<sup>T202/Y204</sup>, pp70S6K1<sup>T389</sup>, and PTEN

| Marker                                           | N (%)    |
|--------------------------------------------------|----------|
| <b>pAKT<sup>S473</sup> H-Score (0-9)</b>         |          |
| 0                                                | 28 (32%) |
| 1                                                | 1 (1%)   |
| 2                                                | 8 (9%)   |
| 3                                                | 48 (55%) |
| 4                                                | 1 (1%)   |
| 5                                                | 0 (0%)   |
| 6                                                | 2 (2%)   |
| 7                                                | 0 (0%)   |
| 8                                                | 0 (0%)   |
| 9                                                | 0 (0%)   |
| <b>pERK1/2<sup>T202/Y204</sup> H-Score (0-9)</b> |          |
| 0                                                | 27 (31%) |
| 1                                                | 22 (25%) |
| 2                                                | 17 (19%) |
| 3                                                | 7 (8%)   |
| 4                                                | 9 (10%)  |
| 5                                                | 0 (0%)   |
| 6                                                | 6 (7%)   |
| 7                                                | 0 (0%)   |
| 8                                                | 0 (0%)   |
| 9                                                | 0 (0%)   |
| <b>pp70S6K1<sup>T389</sup> H-Score (0-9)</b>     |          |
| 0                                                | 2 (2%)   |
| 1                                                | 6 (7%)   |
| 2                                                | 6 (7%)   |
| 3                                                | 60 (68%) |
| 4                                                | 5 (6%)   |
| 5                                                | 0 (0%)   |
| 6                                                | 8 (9%)   |
| 7                                                | 0 (0%)   |
| 8                                                | 0 (0%)   |
| 9                                                | 1 (1%)   |
| <b>PTEN</b>                                      |          |
| Loss*                                            | 12 (14%) |
| Expressed                                        | 76 (86%) |

\*H-Score: 0 and 1.
